# Supplementary material
Source: publisher figshare collection journal article supplement (https://karger.figshare.com/ndownloader/files/31070416)
Supplement: Supplementary file 1 [file 31070416]

Supplementary Table 2. Sensitivity analysis of the association between SUA relative change levels and stroke incidence after controlling renal function.

| △UA  (Relative, %) | Sensitivity analysis 1 | | | Sensitivity analysis 2 | | |
| --- | --- | --- | --- | --- | --- | --- |
| Incidents / participants | HR (95%CI) | *p value* | Incidents / participants | HR (95%CI) | *p value* |
| Per 10% increase | 873/23096 | 1.049(1.010,1.089) | 0.013 | 852/22948 | 1.047(1.007,1.089) | 0.020 |
| >30% loss | 22/514 | 1.102(0.713,1.702) | 0.663 | 21/512 | 1.076(0.689,1.679) | 0.749 |
| 20-30% loss | 68/1783 | 1.076(0.828,1.398) | 0.586 | 67/1775 | 1.071(0.822,1.394) | 0.612 |
| 10-20% loss | 155/4516 | 1.031(0.854,1.245) | 0.752 | 154/4504 | 1.033(0.855,1.249) | 0.735 |
| ±10% | 396/11367 | 1.000 | - | 388/11300 | 1.000 | - |
| 10-20% gain | 120/2699 | 1.217(0.989,1.497) | 0.063 | 115/2677 | 1.204(0.975,1.487) | 0.085 |
| 20-30% gain | 60/1218 | 1.280(0.970,1.687) | 0.081 | 57/1200 | 1.276(0.961,1.693) | 0.092 |
| >30% gain | 52/999 | 1.359(1.008,1.832) | 0.044 | 50/980 | 1.380(1.018,1.871) | 0.038 |
| *p* for trend | 0.057 | | | 0.056 | | |

Sensitivity analysis 1 was adjusted for Model 3 and further excluded individuals with an estimated glomerular filtration rate < 60 mL/min/1.73 m2 in the baseline.

Sensitivity analysis 2 was adjusted for Model 3 and further excluded individuals with an estimated glomerular filtration rate < 60 mL/min/1.73 m2 in baseline or follow-up.
